# Supplementary material for: Ba/Mg co-doped hydroxyapatite/PLGA composites enhance X-ray imaging and bone defect regeneration
Source: Royal Society of Chemistry journal article supplement (doi:10.1039/d1tb01080h), 2021-01-01

**S.1 (A) porosity of the nanocomposites of different nanoparticles. (B) Water contact angle measurements of the nanocomposites.**

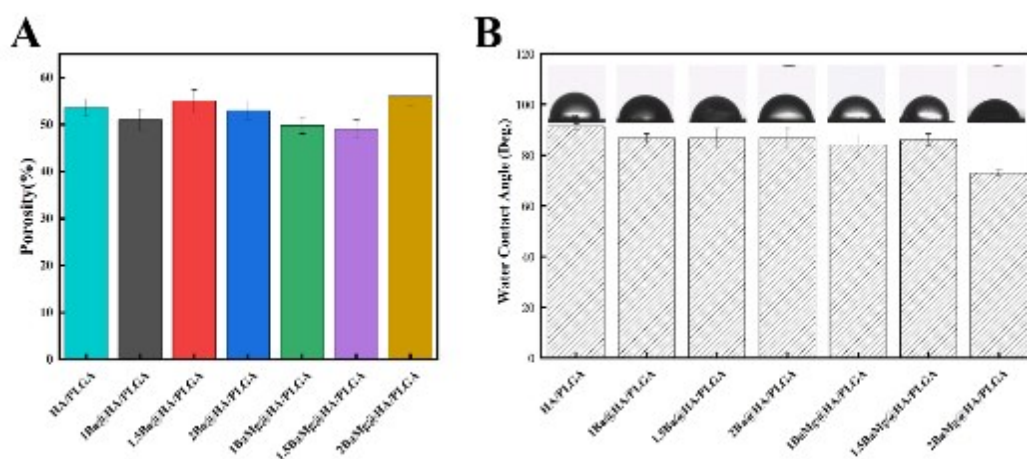

## S.2 Aperture of of the nanocomposites of different nanoparticles.

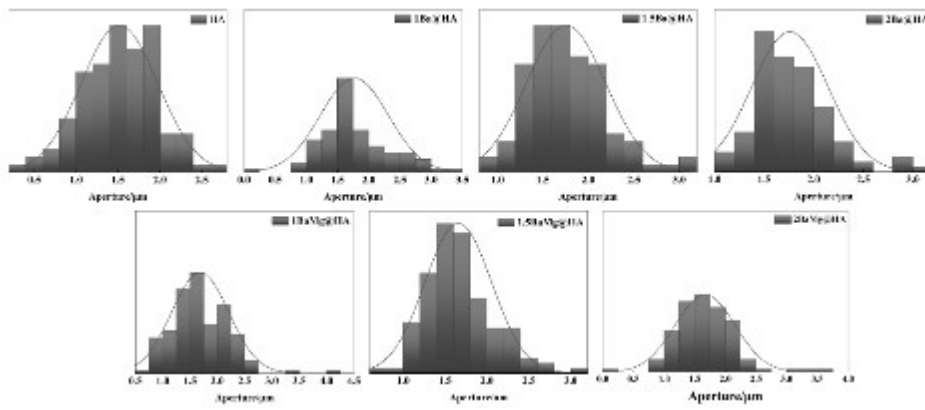

Supplement: d1tb01080h1.pdf [file d1tb01080h1.pdf]
